# Supplementary material
Source: publisher figshare collection journal article supplement (https://sage.figshare.com/ndownloader/files/22827032)
Supplement: Supplementary file 1 [file 22827032]

**Systematic Review of Safety Skill Interventions for Individuals with Autism Spectrum Disorder**

Elif Tekin-Iftar, Seray Olcay, Nusinem Sirin, Hatice Bilmez, H. Deniz Degirmenci, and Belva

C. Collins

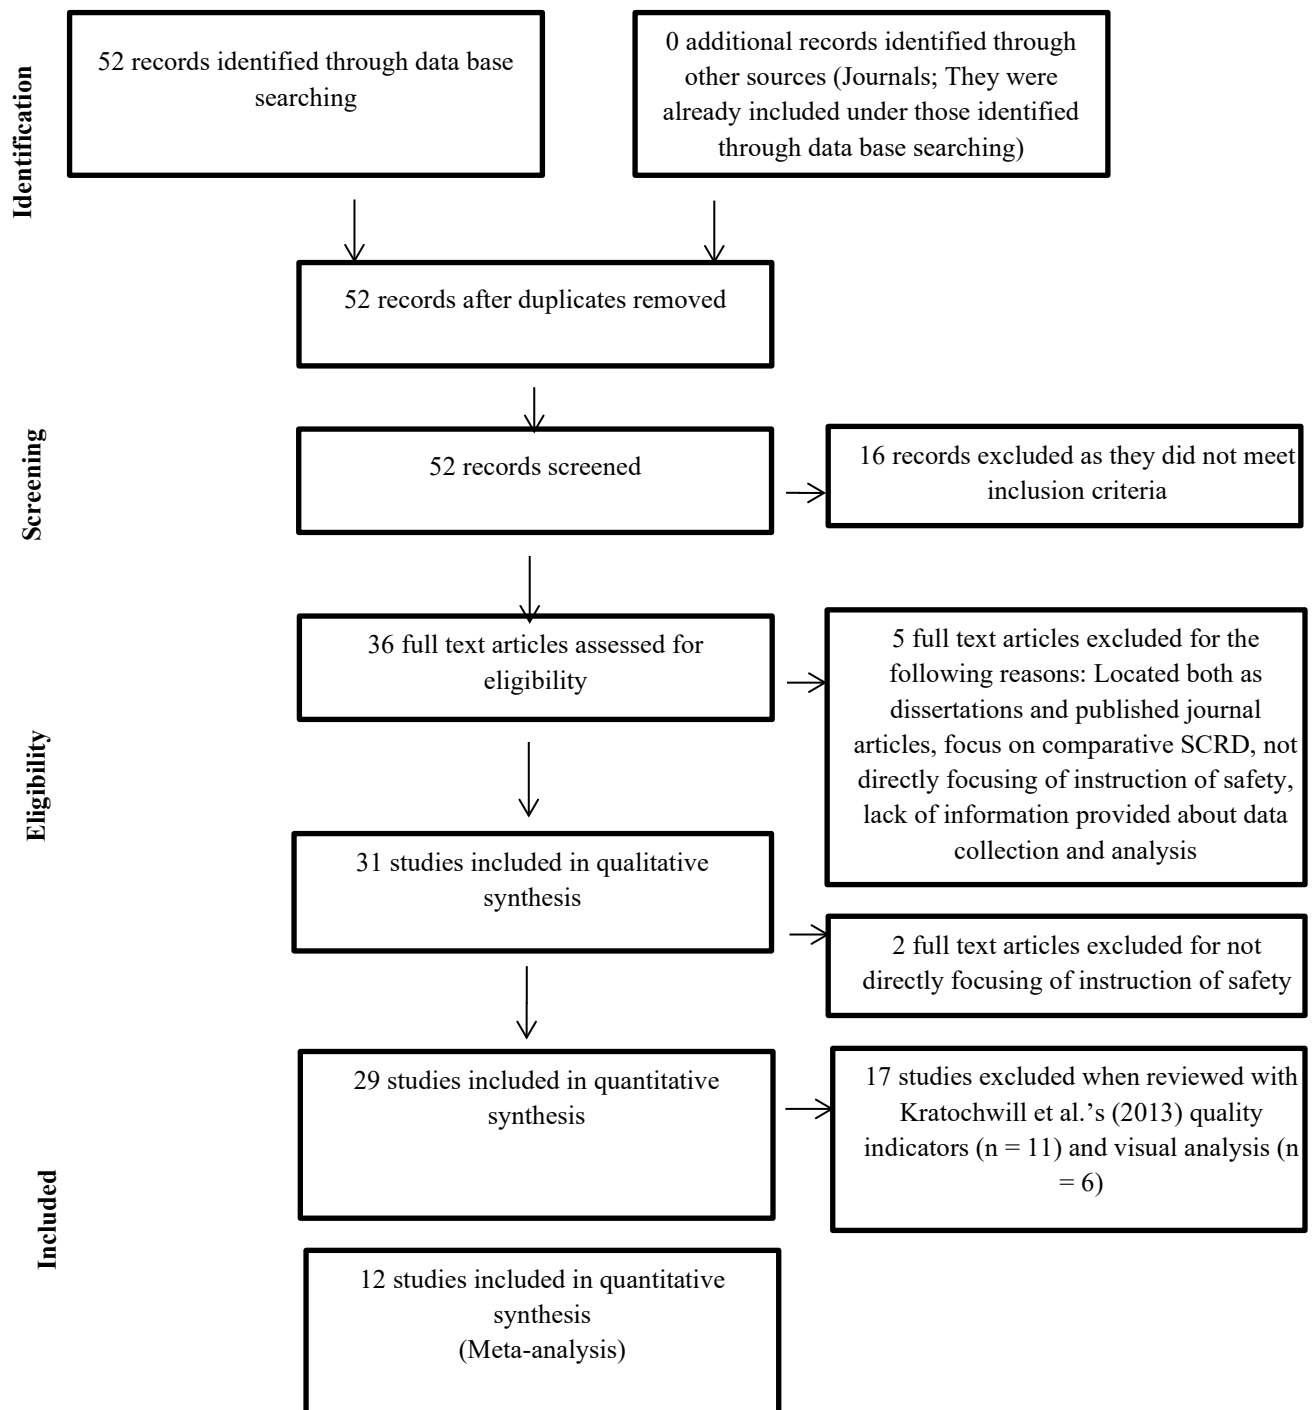

Figure 1. Procedures Followed During Search

## ANALYSIS OF SAFETY SKILLS STUDIES

**Supplemental Table 1***Coding Studies According to Kratochwill et al. (2013) Criteria*

| Studies                          | Systematic Manipulation of IV | IOA for 20% of Sessions | IOA at or Above 80% | At least 3 Demonstration of Effect | 5 Data Points per Condition | 3 Data Points per Condition | Classification of Standards | Classification of Evidence of Effectiveness (see Supplemental Table 2) |
|----------------------------------|-------------------------------|-------------------------|---------------------|------------------------------------|-----------------------------|-----------------------------|-----------------------------|------------------------------------------------------------------------|
| Akmanoglu and Tekin-Iftar (2011) | Y                             | Y                       | Y                   | Y                                  | N                           | Y                           | MS-R                        | No evidence                                                            |
| Bergstorm et al. (2012)          | Y                             | Y                       | Y                   | Y                                  | N                           | N                           | nMS                         | -                                                                      |
| Bergstorm et al. (2014)          | Y                             | Y                       | Y                   | Y                                  | N                           | N                           | nMS                         | -                                                                      |
| Ergenekon (2012)                 | Y                             | Y                       | Y                   | Y                                  | N                           | Y                           | MS-R                        | Strong                                                                 |
| Garcia et al. (2016)             | Y                             | Y                       | Y                   | Y                                  | Y                           | Y                           | MS                          | No evidence                                                            |
| Godish et al. (2017)             | Y                             | N                       | Y                   | Y                                  | N                           | Y                           | nMS                         | -                                                                      |
| Goldsmith (2008)                 | Y                             | Y                       | Y                   | Y                                  | N                           | Y                           | MS-R                        | Moderate                                                               |
| Gunby et al. (2010)              | Y                             | Y                       | Y                   | Y                                  | N                           | N                           | nMS                         | -                                                                      |
| Gunby and Rapp (2014)            | Y                             | Y                       | Y                   | Y                                  | N                           | Y                           | MS-R                        | Strong                                                                 |
| Harriage et al. (2016)           | Y                             | Y                       | Y                   | Y                                  | N                           | Y                           | MS-R                        | Strong                                                                 |
| Hawkins (2016)                   | Y                             | Y                       | N                   | Y                                  | N                           | Y                           | nMS                         | -                                                                      |
| Hoch et al. (2009)               | Y                             | Y                       | Y                   | Y                                  | N                           | Y                           | MS-R                        | Strong                                                                 |
| Honsberger (2015)                | Y                             | Y                       | Y                   | Y                                  | N                           | Y                           | MS-R                        | Strong                                                                 |
| Johnston (2010)                  | Y                             | Y                       | Y                   | Y                                  | N                           | Y                           | MS-R                        | No evidence                                                            |
| Kearney et al. (2017)            | Y                             | Y                       | Y                   | Y                                  | N                           | Y                           | MS-R                        | No evidence                                                            |
| King and Miltenberger (2017)     | Y                             | Y                       | Y                   | Y                                  | N                           | Y                           | MS-R                        | No evidence                                                            |
| Ledbetter-Cho et al. (2016)      | Y                             | Y                       | Y                   | Y                                  | N                           | Y                           | MS-R                        | Moderate                                                               |
| Levy et al. (2017)               | Y                             | Y                       | Y                   | Y                                  | N                           | Y                           | MS-R                        | Strong                                                                 |
| McDowell et al. (2017)           | Y                             | N                       | N                   | N                                  | N                           | N                           | nMS                         | -                                                                      |
| Morgan (2012)                    | Y                             | Y                       | Y                   | Y                                  | N                           | N                           | nMS                         | -                                                                      |

# ANALYSIS OF SAFETY SKILLS STUDIES

|                                |   |   |   |   |   |   |      |             |
|--------------------------------|---|---|---|---|---|---|------|-------------|
| Morgan (2017)                  | Y | N | N | N | N | Y | nMS  | -           |
| Morgan and Miltenberger (2017) | Y | Y | Y | Y | N | N | nMS  | -           |
| Rodriguez (2016)               | Y | Y | Y | Y | N | N | nMS  | -           |
| Rossi et al. (2017)            | Y | Y | Y | Y | Y | Y | MS   | Strong      |
| Sokolosky (2011)               | Y | Y | Y | N | N | Y | nMS  | -           |
| Summers et al. (2011)          | Y | Y | Y | Y | N | Y | MS-R | Strong      |
| Taylor et al. (2004)           | Y | Y | Y | Y | N | Y | MS-R | No evidence |
| Tucker (2016)                  | Y | Y | Y | Y | N | Y | MS-R | Strong      |
| Winterling et al. (1992)       | Y | Y | Y | Y | N | Y | MS-R | Moderate    |

Notes: MS = Meet standards; MS-R = Meet standards with reservations; nMS = Does not meet standards.

# ANALYSIS OF SAFETY SKILLS STUDIES

**Supplemental Table 2**

*Demonstration of Effect through Visual Analysis*

| Studies                          | Level | Trend    | Stability                                           | Immediacy of Effect                                         | Overlap                                                             | Data Patterns |
|----------------------------------|-------|----------|-----------------------------------------------------|-------------------------------------------------------------|---------------------------------------------------------------------|---------------|
| Akmanoglu and Tekin-Iftar (2011) | Yes   | Positive | No<br>P1, P2 and P3: Variable                       | Yes<br>P1, P3: Moderate; P2: No delay                       | No<br>P1: Ineffective; P2, P3: Questionable                         | No            |
| Ergenekon (2012)                 | Yes   | Positive | Yes<br>P1: Low; P2: Moderate; P3: High              | Yes<br>P1: Moderate; P2, P3: No delay                       | Yes<br>P1: Questionable; P2: Effective; P3: Very effective          | Yes           |
| Garcia et al. (2016)             | Yes   | Positive | No<br>P1 and P2: Moderate; P3: Variable             | Yes<br>P1, P2 and P3: No delay                              | Yes<br>P1, P2 and P3: Moderate                                      | No            |
| Goldsmith (2008)                 | Yes   | Positive | Yes<br>P1, P2 and P3: Moderate<br>P4: Low; P5: High | Yes<br>P1, P2, P3 and P4: No delay; P5: No immediate effect | Yes<br>P1, P2, & P3: Very effective; P4: Effective; P5: Ineffective | Yes           |
| Gunby and Rapp (2014)            | Yes   | Positive | Yes<br>P1, P2 and P3: High                          | Yes<br>P1, P2 and P3: No delay                              | Yes<br>P1, P2 and P3: Very effective                                | Yes           |
| Harriage et al. (2016)           | Yes   | Positive | Yes<br>P1 and P3: Moderate; P2: High                | Yes<br>P1 and P2: No delay; P3: No delay to moderate        | Yes<br>P1: Very effective; P2: Effective; P3: Questionable          | Yes           |
| Hoch et al. (2009)               | Yes   | Positive | Yes<br>P1 and P3: High; P2: Low                     | Yes<br>P1, P2 and P3: No delay                              | Yes<br>P1, P2: Very effective; P3 : Effective                       | Yes           |
| Honsberger (2015)                | Yes   | Positive | Yes<br>P1, P2, P3, P4 and P5: High                  | Yes<br>P1, P2, P3, P4 and P5: No delay                      | Yes<br>P1, P2, P3, P4 and P5: Very effective                        | Yes           |

## ANALYSIS OF SAFETY SKILLS STUDIES

|                              |     |          |                                                     |                                                                 |                                                                             |     |
|------------------------------|-----|----------|-----------------------------------------------------|-----------------------------------------------------------------|-----------------------------------------------------------------------------|-----|
| Johnston (2010)              | Yes | Positive | Yes<br>P1 and P2: Moderate                          | No<br>P1: No delay- no immediate effect for P1; P2: Short delay | No<br>P1: Ineffective; P2: Questionable                                     | No  |
| Kearney et al. (2017)        | Yes | Positive | No<br>P1: Variable; P2: Low; P3: High               | Yes<br>P1, P2 and P3: No delay                                  | Yes<br>P1 and P3: Very effective P2 Effective                               | No  |
| King and Miltenberger (2017) | Yes | Positive | No<br>P1: Low; P2 and P3: Variable                  | Yes<br>P1 and P3: No delay for; P3: Moderate                    | No<br>P1: Ineffective; P2 and P3 Questionable                               | No  |
| Ledbetter-Cho et al. (2016)  | Yes | Positive | Yes<br>P1, P3 and P4: Moderate; P2: High            | Yes<br>P1, P2, P3 and P4: No delay                              | Yes<br>P1: Effective; P2: Very effective; P3: Ineffective; P4: Questionable | Yes |
| Levy et al. (2017)           | Yes | Positive | Yes<br>P1 and P3: Moderate; P2: High                | Yes<br>P1, P2 and P3: No delay                                  | Yes<br>P1, P2 and P3: Very effective                                        | Yes |
| Rossi et al. (2017)          | Yes | Positive | Yes<br>P1, P2 and P3: High                          | Yes<br>P1, P2 and P3: No delay                                  | Yes<br>P1 and P3: Very effective; P2: Effective                             | Yes |
| Summers et al. (2011)        | Yes | Positive | Yes<br>P1, P4, P5 and P6: High; P2 and P3: Moderate | Yes<br>P1, P2, P3, P4, P5 and P6: No delay                      | Yes<br>P1, P2, P4 and P5: Very effective; P3 and P6: Effective              | Yes |
| Taylor et al. (2004)         | Yes | Positive | No<br>P1: Moderate; P2 and P3: Variable             | Yes<br>P1, P2 and P3: No delay                                  | No<br>P1: Questionable; P2 and P3: Ineffective                              | No  |
| Tucker (2016)                | Yes | Positive | Yes<br>P1 and P2: High; P3: Moderate                | Yes<br>P1, P2 and P3: No delay                                  | Yes<br>P1: Very effective; P2 and P3: Effective                             | Yes |

## ANALYSIS OF SAFETY SKILLS STUDIES

|                             |     |          |                                                      |                                                 |                                                         |     |
|-----------------------------|-----|----------|------------------------------------------------------|-------------------------------------------------|---------------------------------------------------------|-----|
| Winterling et al.<br>(1992) | Yes | Positive | Yes<br>P1 and P4: Moderate; P2:<br>Low; P3: Variable | Yes<br>P1, P2 and P4: No delay; P3:<br>Moderate | Yes<br>P1: Very effective; P2, P3, and P4:<br>Effective | Yes |
|-----------------------------|-----|----------|------------------------------------------------------|-------------------------------------------------|---------------------------------------------------------|-----|

---

**Supplemental Table 3***Percentage of IRD Calculations for Safety Skills Instruction*

| Studies                     | Intervention IRD | Number of Tiers | Effect Size  |
|-----------------------------|------------------|-----------------|--------------|
| Ergenekon (2012)            | 0.7981           | 9               | Large effect |
| Goldsmith (2008)            | 0.7984           | 5               | Large effect |
| Gunby and Rapp (2014)       | 1.0000           | 3               | Large effect |
| Harriage et al. (2016)      | 0.8487           | 9               | Large effect |
| Hoch et al. (2009)          | 0.9524           | 3               | Large effect |
| Honsberger (2015)           | 1.0000           | 5               | Large effect |
| Ledbetter-Cho et al. (2016) | 0.7178           | 4               | Large effect |
| Levy et al. (2017)          | 1.0000           | 3               | Large effect |
| Rossi et al. (2017)         | 0.9444           | 9               | Large effect |
| Summers et al. (2011)       | 0.9392           | 6               | Large effect |
| Tucker (2016)               | 0.9034           | 9               | Large effect |
| Winterling et al. (1992)    | 0.7774           | 4               | Large effect |

### References

References marked with one asterisk indicate studies reviewed for Kratochwill et al.'s (2013) criteria. References marked with two asterisks indicate studies retained for descriptive and visual analysis. References marked with three asterisks indicate studies retained for effect size analyses.

- \*\*Akmanoglu, N. & Tekin-Iftar, E. (2011). Teaching children with autism how to respond to the lures of strangers. *Autism: The International Journal of Research and Practice*, 15, 185-203. doi: 10.1177/1362361309352180
- \*Bergstrom, R., Najdowski, A.C., & Tarbox, J. (2012). Teaching children with autism to seek help when lost in public. *Journal of Applied Behavior Analysis*, 45(1), 191-195.  
<https://doi.org/10.1901/jaba.2012.45-191>
- \*Bergstrom, R., Najdowski, A.C., & Tarbox, J. (2014). A systematic replication of teaching children with autism to respond appropriately to lures from strangers. *Journal of Applied Behavior Analysis*, 47(4), 861-865. <https://doi.org/10.1002/jaba.175>
- \*\*\*Ergenekon, Y. (2012). Teaching basic first-aid skills against home accidents to children with autism through video modeling. *Educational Sciences, Theory, & Practice*, 12(4), 2759-2766.
- \*\*Garcia, D., Dukes, C., Brady, M.P., Scott, J., & Wilson, C.L. (2016). Using modeling and rehearsal to teach fire safety to children with autism. *Journal of Applied Behavior Analysis*, 49(3), 699-704. <https://doi.org/10.1002/jaba.331>
- \*Godish, D., Miltenberger, R., & Sanchez, S. (2017). Evaluation of video modeling for teaching abduction prevention skills to children with autism spectrum disorder. *Advances in Neurodevelopmental Disorders*, 1(3), 221-229.  
<https://doi.org/10.1007/s41252-017-0026-4>



\*\*\*Goldsmith, T.R. (2008). *Using virtual reality enhanced behavioral skills training to teach street-crossing skills to children and adolescents with autism spectrum disorders.*

Unpublished doctoral dissertation, Western Michigan University, USA.

\*\*\*Gunby, K.V., & Rapp, J.T. (2014). The use of behavioral skills training and in situ feedback to protect children with autism from abduction lures. *Journal of Applied Behavior Analysis*, 47(4), 856-860. <https://doi.org/10.1002/jaba.173>

\*Gunby, K.V., Carr, J.E., & Leblanc, L.A. (2010). Teaching abduction-prevention skills to children with autism. *Journal of Applied Behavior Analysis*, 43(1), 107-112. <https://doi.org/10.1901/jaba.2010.43-107>

\*\*\*Harriage, B., Blair, K.C., & Miltenberger, R. (2016). An evaluation of a parent implemented in situ pedestrian safety skills intervention for individuals with autism. *Journal of Autism and Developmental Disorders*, 46(6), 2017–2027. <https://doi.org/10.1007/s10803-016-2730-8>

Hawkins, T. (2016). *Teaching street-crossing skills to special education students.* Unpublished master's thesis, California State University, USA.

\*\*\*Hoch, H., Taylor, B. A., & Rodriguez, A. (2009). Teaching teenagers with autism to answer cell phones and seek assistance when lost. *Behavior Analysis in Practice*, 2(1), 14-20. <https://doi.org/10.1007/BF03391733>

\*\*Honsberger, T. (2015). *Teaching individuals with autism spectrum disorder safe pedestrian skills using video modeling with in situ video prompting.* Unpublished doctoral dissertation, Florida Atlantic University, USA.

\*\*Johnston, M. (2010). *Teaching sexual abuse prevention skills to two children with intellectual disabilities through game play.* Unpublished master's thesis, Brock University, USA.

- \*\*Kearney, K.B., Brady, M.P., Hall, K., & Honsberger, T. (2018). Using peer-mediated literacy-based behavioral interventions to increase first aid safety skills in students with developmental disabilities. *Behavior Modification*, 42(5), 1-22.  
<https://doi.org/10.1177/0145445517725866>
- \*\*King, S., & Miltenberger, R. (2017). Evaluation of video modeling to teach children diagnosed with autism to avoid poison hazards. *Advances in Neurodevelopmental Disorders*, 1(4), 221-229. <https://doi.org/10.1007/s41252-017-0028-2>
- \*\*\*Ledbetter-Cho, K., Lang, R., Davenport, K., Moore, M., Lee, A., O'Reilly, M., Watkins, L., & Falcomata, T. (2016). Behavioral skills training to improve the abduction-prevention skills of children with autism. *Behavior Analysis Practice* 9(3), 266-270.  
<https://doi.org/10.1007/s40617-016-0128-x>
- \*\*\*Levy, K.M., Ainsleigh, S.A., & Hunsinger-Harris, M.L. (2017). Let's go under! Teaching water safety skills using a behavioral treatment package. *Education and Training in Autism and Developmental Disorders*, 52(2), 186-193.
- \*McDowell, C., Hardy, N., & Smyth, S. (2017). Teaching children with autism to use cell phones to seek assistance when lost. *Psychology & Psychological Research International Journal*, 2(5), 1-4. doi:10.23880/PPRIJ-16000137
- \*Morgan, K. (2012). *Evaluation of video modeling and in situ training to teach gun safety skills to individuals with autism spectrum disorder*. Unpublished master's thesis, University of South Florida, USA.
- \*Morgan, K., & Miltenberger, R.G. (2017). Evaluation of video modeling and in situ training to teach firearm avoidance skills to individuals with autism spectrum disorder. *Advances in Neurodevelopmental Disorders*, 1(3), 221-229.  
<https://doi.org/10.1007/s41252-017-0024-6>

- \*Morgan, L.A. (2017). *Fire safety training using video modeling in young children with autism spectrum disorder*. Unpublished master's thesis, Rowan University, USA.
- \*Rodriguez, C. (2016). *It's not always a stranger that's the danger: a safe-word intervention for abduction prevention in children with autism spectrum disorders*. Unpublished master's thesis, California State University, USA.
- \*\*\*Rossi, M.R., Vladescu, J.C., Reeve, K.F., & Gross, A.C. (2017). Teaching safety responding to children with autism spectrum disorder. *Education and Treatment of Children*, 40(2), 187-208. doi:10.1353/etc.2017.0009
- \*Sokolosky, S. (2011). *Effectiveness of using video modeling for teaching safety skills for children with autism and other developmental disabilities*. Unpublished doctoral dissertation, Texas Tech University, USA.
- \*\*\*Summers, J., Tarbox, J., Findel-Pyles, R.S., Wilke, A.E., Bergstrom, R., & Williams, W.L. (2011). Teaching two household safety skills to children with autism. *Research in Autism Spectrum Disorders*, 5(1), 629-632.  
<https://doi.org/10.1016/j.rasd.2010.07.008>
- \*\*Taylor, B.A., Hughes, C.E., Richard, E., Hoch, H., & Coello, A.R. (2004). Teaching teenagers with autism to seek assistance when lost. *Journal of Applied Behavior Analysis*, 37(1), 79-82. <https://doi.org/10.1901/jaba.2004.37-79>
- \*\*\*Tucker, M. (2016). *Teaching water safety skills to children with autism using behavioral skills training*. Unpublished master's thesis, University of North Texas, USA.
- \*\*\*Winterling, V., Gast, D.L., Wolery, M., & Farmer, J.A. (1992). Teaching safety skills to high school students with moderate disabilities. *Journal of Applied Behavior Analysis*, 25(1), 217-227. <https://doi.org/10.1901/jaba.1992.25-217>
